# Supplementary material for: Constructing pendent imidazolium-based poly(phenylene oxide)s for anion exchange membranes using a click reaction
Source: Royal Society of Chemistry journal article supplement (doi:10.1039/c5ra17748k), 2015-01-01
Supplement: c5ra17748k1.pdf [file c5ra17748k1.pdf]

## Electronic Supplementary Information

for

### **Constructing pendent imidazolium-based poly(phenylene oxide)s for anion exchange membranes using click reaction**

Jie Wang, Haibing Wei\*, Shanzhong Yang, Huagao Fang, Pei Xu and Yunsheng Ding\*

Department of Polymer Science and Engineering, College of Chemistry and Chemical Engineering, Anhui Key Laboratory of Advanced Functional Materials and Devices, Hefei University of Technology, Hefei 230009, China

\*To whom correspondence should be addressed.

E-mail: [hbwei@hfut.edu.cn](mailto:hbwei@hfut.edu.cn) (H. Wei); [dingys@hfut.edu.cn](mailto:dingys@hfut.edu.cn) (Y. Ding)

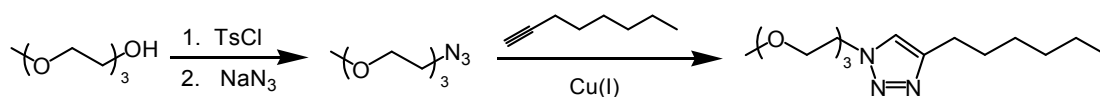

**Scheme S1.** Synthetic routes employed for the preparation of model compound, 1-methoxytri(ethylene glycol)-4-hexyl-1,2,3-triazole.

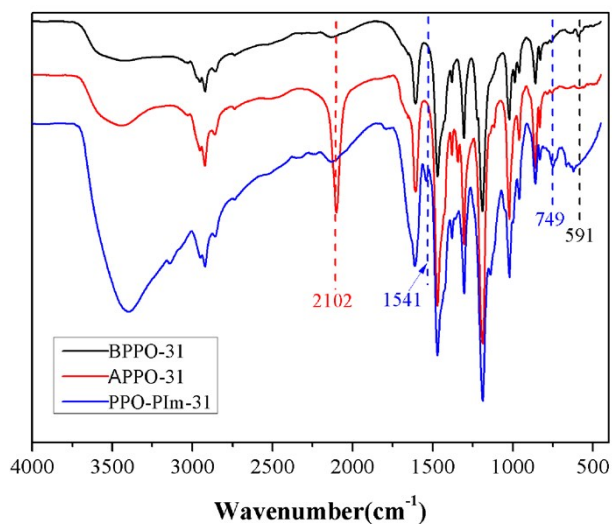

**Figure S1.** FT-IR spectra of BPPO-31, APPO-31, and PPO-PIm-31 in Cl<sup>-</sup> form.

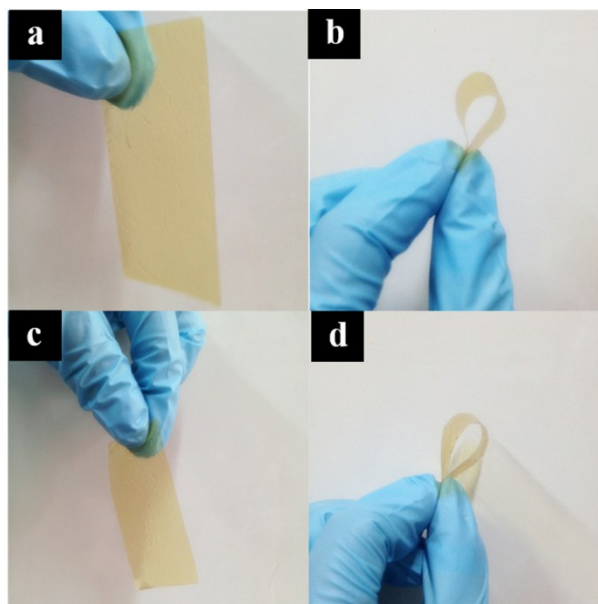

**Figure S2.** Pictures of PPO-PIm-40 (a, b) before and (c, d) after immersed in water at 30 °C for 48 h.

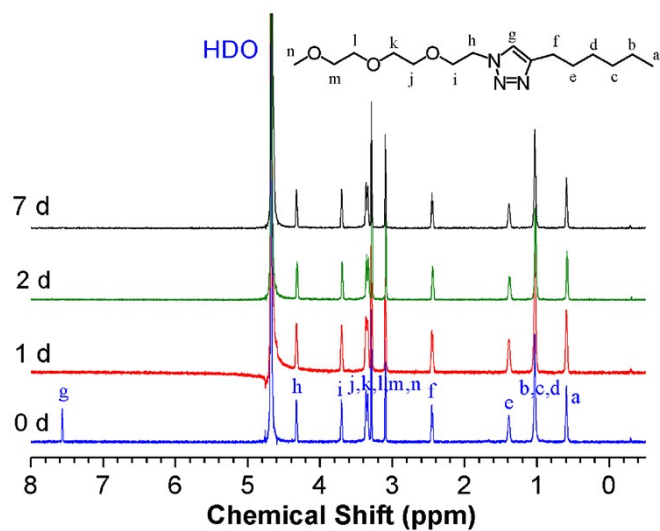

**Figure S3.**  $^1\text{H}$  NMR spectra (600 MHz,  $\text{D}_2\text{O}$ ) of model molecule after immersion in 1 M NaOH solution at 80 °C for several days.

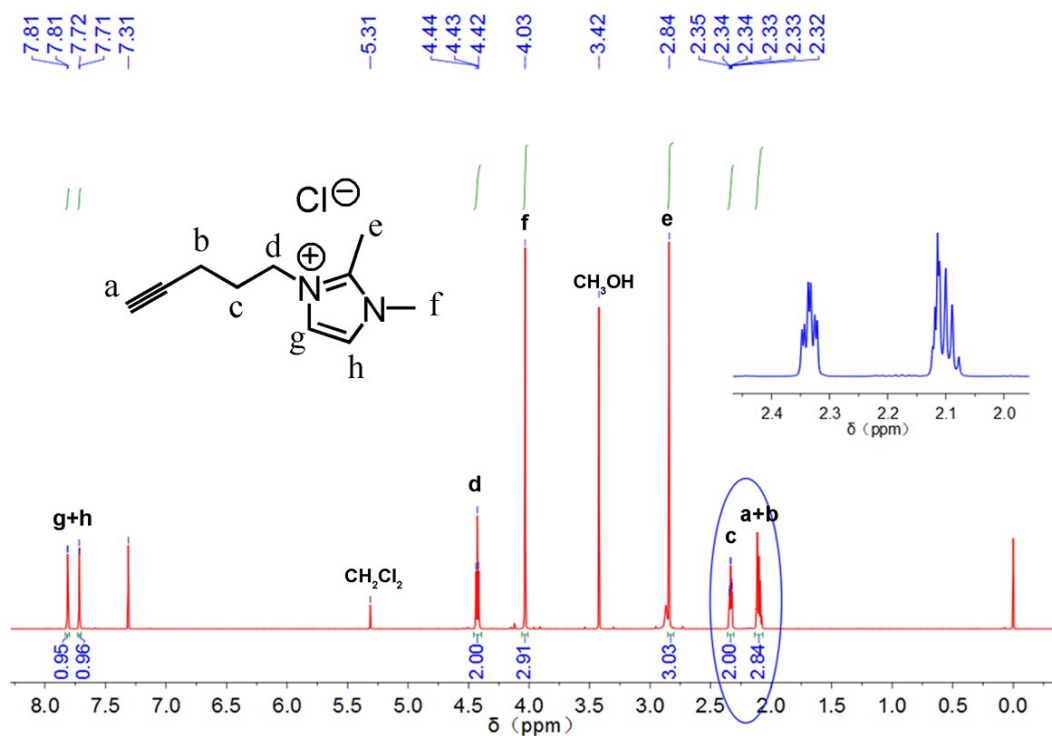

**Figure S4.**  $^1\text{H}$  NMR spectrum of 1,2-dimethyl-3-(4-pentynyl)imidazolium chloride in  $\text{CDCl}_3$

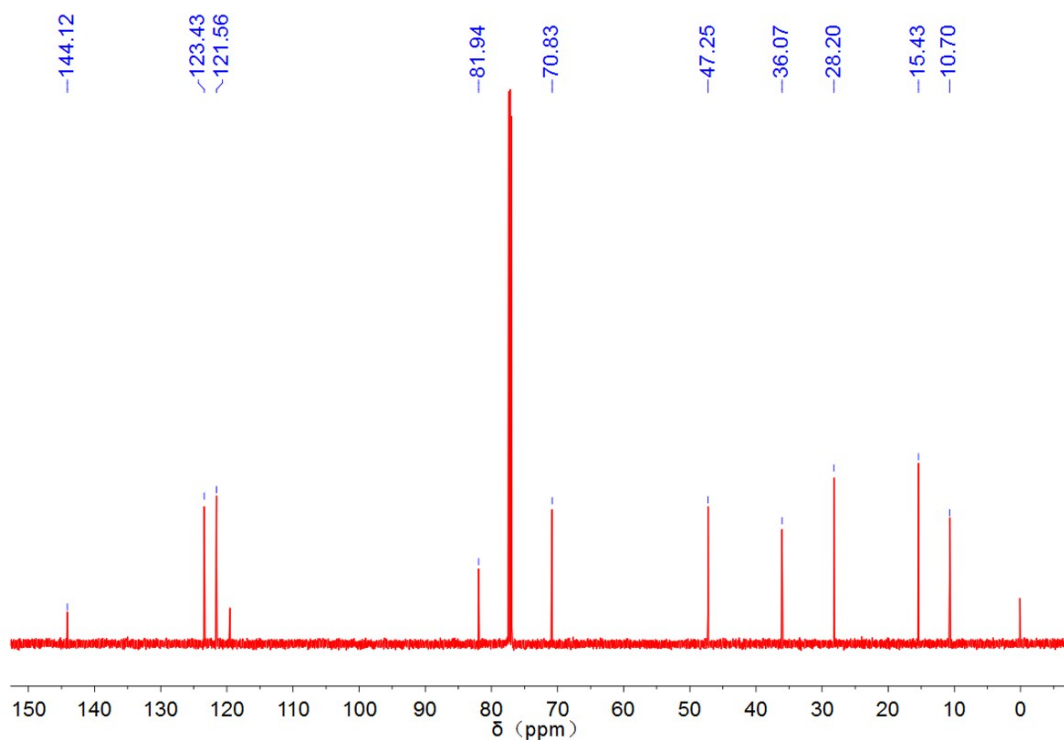

**Figure S5.**  $^{13}\text{C}$  NMR spectrum of 1,2-dimethyl-3-(4-pentynyl)imidazolium chloride in  $\text{CDCl}_3$

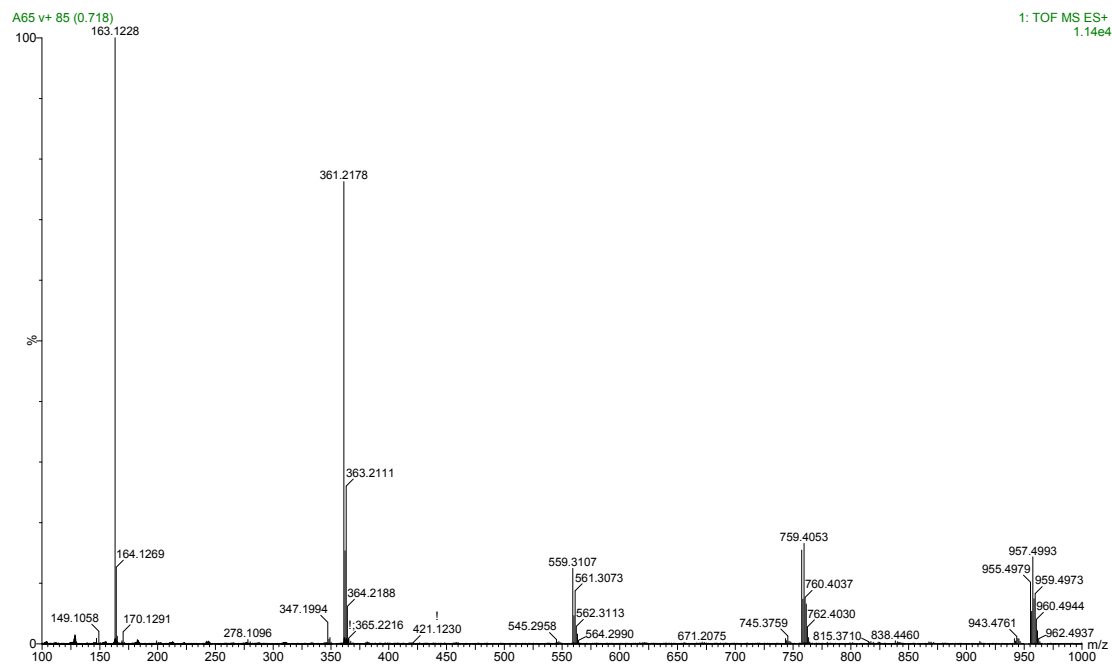

**Figure S6.** HR mass spectrum of 1,2-dimethyl-3-(4-pentynyl)imidazolium chloride

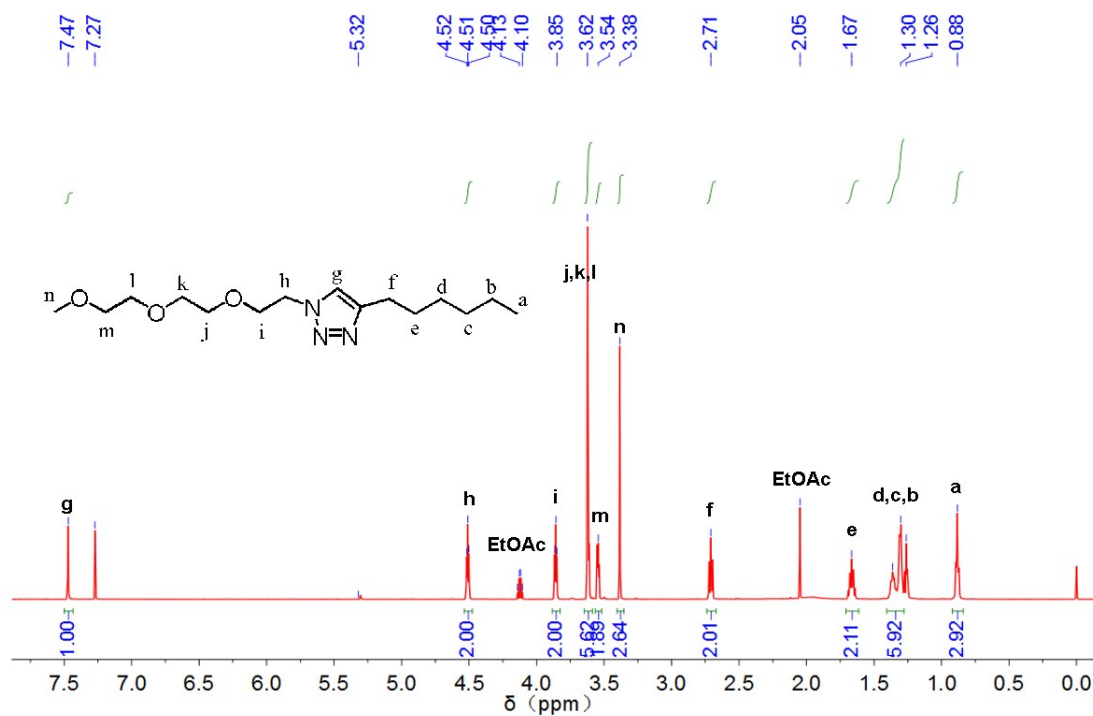

**Figure S7.** <sup>1</sup>H NMR spectrum of 1-methoxytri(ethylene glycol)-4-hexyl-1,2,3-triazole in CDCl<sub>3</sub>

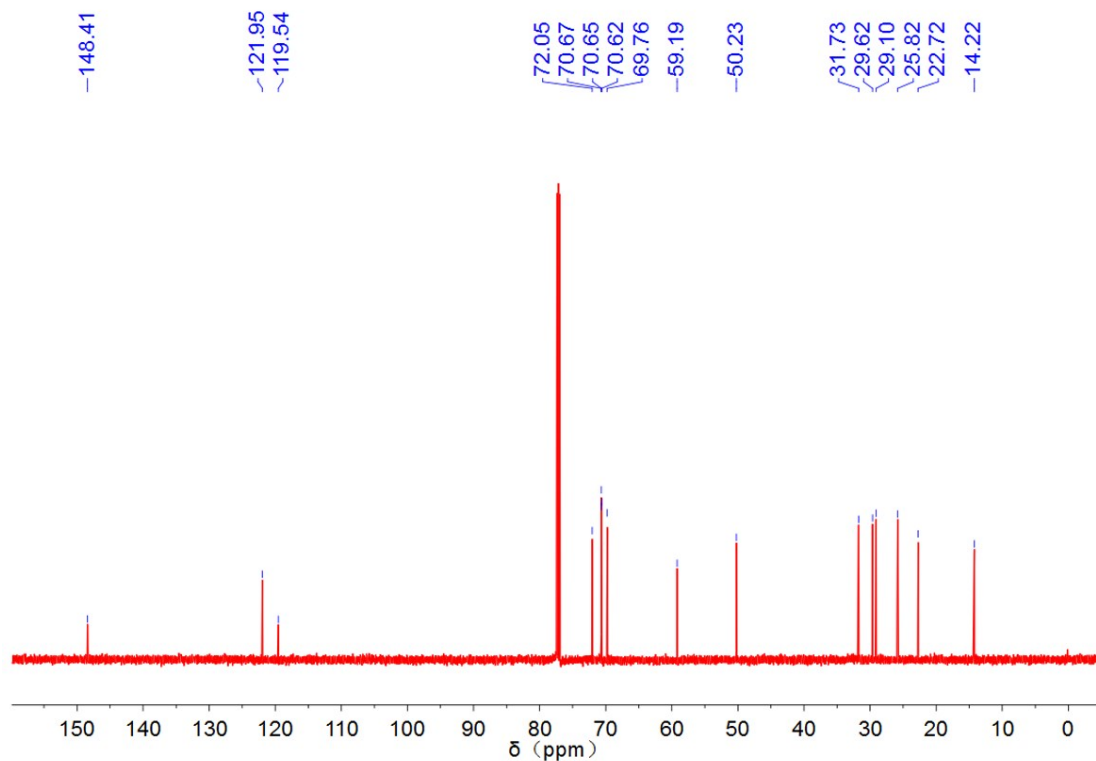

**Figure S8.** <sup>13</sup>C NMR spectrum of 1-methoxytri(ethylene glycol)-4-hexyl-1,2,3-triazole in CDCl<sub>3</sub>

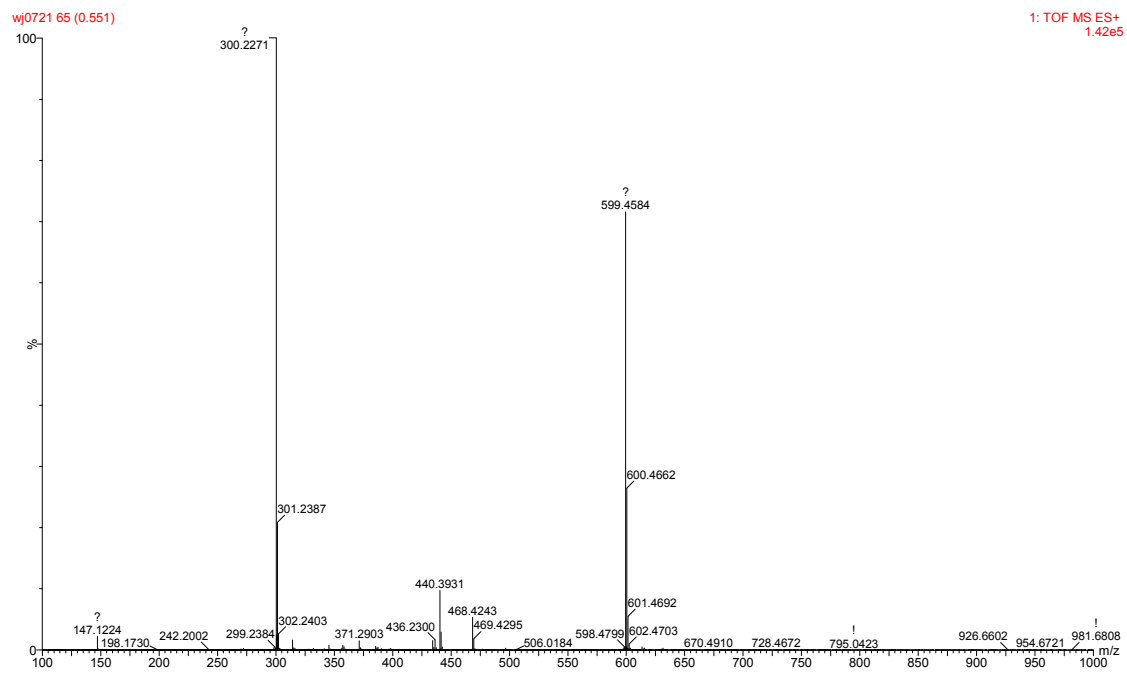

**Figure S9.** HR mass spectrum of 1-methoxytri(ethylene glycol)-4-hexyl-1,2,3-triazole
